# Supplementary material for: Understanding Si/Al distributions in Al-rich zeolites: the role of water in determining the structure of Goosecreekite
Source: Royal Society of Chemistry journal article supplement (doi:10.1039/b009623g), 2001-01-01
Supplement: b009623g.doc [file b009623g.doc]

#
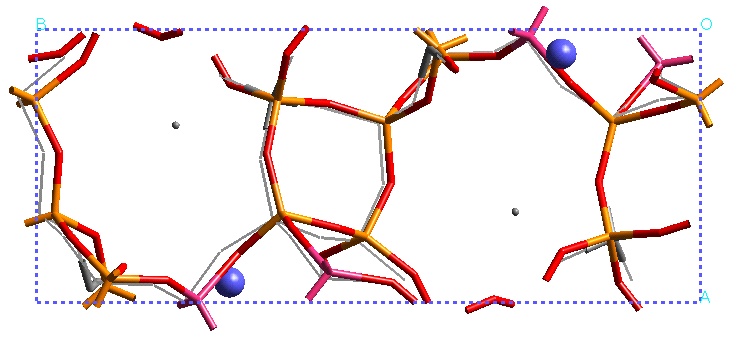


## Supplementary 1.

The calculated dehydrated C1 structure and a comparison with the experimental framework structure (Al highlighted in grey and pink). Calculated Ca2+positions are shown in blue with the experimental positions shown as grey spheres.

##
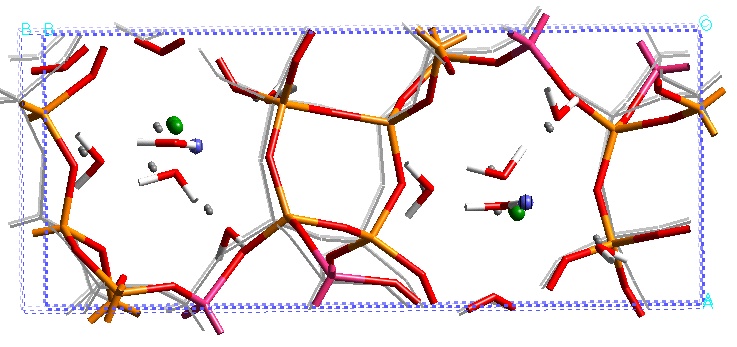


## Supplementary 2.

The calculated hydrated C1 structure and a comparison with the experimental framework structure (Al highlighted in grey and pink). Calculated Ca2+positions are shown as green spheres with the experimental positions shown as blue spheres. Grey spheres show the experimental water oxygen positions.

##
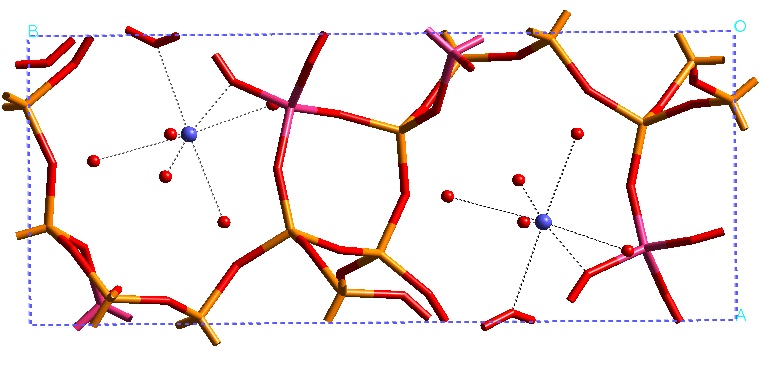


## Supplementary 3.

The experimental structure of hydrated Goosecreekite highlighting the Ca2+ coordination sphere, which should be compared to our results given in Figure 2.
